# Supplementary material
Source: publisher site journal article supplement (https://www.dovepress.com/article/457731)
Supplement: Supplementary file 1 [file get_supplementary_file.php]

## Supplement

**Table S1:** Associations with excessive eating behaviors<sup>a</sup>

|                        | EE > 50<br>(n = 87/537) | UE > 50<br>(n = 83/537) | CR > 50<br>(n = 139/538) |
|------------------------|-------------------------|-------------------------|--------------------------|
| Sweets (ref=never)     |                         |                         |                          |
| Few biscuits/day       | 2.7 (1.20, 6.1)*        | 5.0 (1.8, 14.2)**       | 0.4 (0.3, 0.7)**         |
| Several times/day      | 19.8 (6.8, 57.2)***     | 15.6 (4.7, 51.4)***     | 0.1 (0.04, 0.4)***       |
| Dieting (ref=never)    |                         |                         |                          |
| Former only            | 3.3 (1.6, 7.1)**        | -                       | 3.0 (1.7, 5.4)***        |
| Current                | 9.2 (3.7, 23.0)***      | -                       | 15.4 (7.3, 32.5)***      |
| Living with a partner  | 0.54 (0.30, 0.98)*      | -                       | -                        |
| Wellbeing <sup>b</sup> | 0.62 (0.51, 0.75)***    | 0.80 (0.67, 0.95)*      | -                        |
| Coffee (cups/day)      | -                       | -                       | 1.1 (1.0, 1.2)*          |
| AUROC                  | 0.79                    | 0.66                    | 0.74                     |

\* p < .05, \*\* p < .01, \*\*\* p < .001

<sup>a</sup> logistic regression of TFEQ scores on sociodemographic and lifestyle variables as well as the Eysenck lie scale, using stepwise forward selection of variables (odds ratios with 95% CI)

<sup>b</sup> seven categories, higher is better

**Table S2:** Correlates of dieting behavior <sup>a</sup>

|                                | Dieting behavior   |                          |                     | p-value |
|--------------------------------|--------------------|--------------------------|---------------------|---------|
|                                | Never<br>(n = 163) | Former only<br>(n = 319) | Current<br>(n = 64) |         |
|                                | Mean (SD)          | Mean (SD)                | Mean (SD)           | p-value |
| EE <sup>b</sup>                | 16.8 (20.8)        | 28.5 (24.6)              | 40.5 (28.2)         | <.0001  |
| UE <sup>b</sup>                | 23.3 (17.9)        | 30.5 (19.8)              | 34.3 (21.9)         | <.0001  |
| CR <sup>b</sup>                | 25.2 (19.6)        | 39.1 (19.7)              | 57.1 (17.3)         | <.0001  |
| Wellbeing <sup>c</sup>         | 3.9 (1.4)          | 3.7 (1.3)                | 3.3 (1.2)           | 0.007   |
| Ethanol (g/day)                | 4.7 (4.3)          | 5.9 (4.9)                | 4.4 (4.7)           | 0.006   |
| Coffee (cups/day)              | 2.2 (1.9)          | 2.7 (2.0)                | 2.8 (2.1)           | 0.003   |
| Eysenck lie scale <sup>d</sup> | 3.0 (1.8)          | 2.9 (1.8)                | 2.6 (1.6)           | 0.2     |
|                                | N (%)              | N (%)                    | N (%)               | p-value |
| Age stratum 50 (ref=38)        | 80 (49)            | 181 (57)                 | 33 (52)             | 0.3     |
| University education           | 122 (76)           | 203 (65)                 | 37 (59)             | 0.01    |
| Low family SES                 | 20 (13)            | 43 (14)                  | 11 (19)             | 0.5     |
| Living with a partner          | 131 (81)           | 240 (76)                 | 56 (88)             | 0.1     |
| Sweets: never                  | 29 (18)            | 61 (19)                  | 20 (31)             | 0.2     |
| Few sweets/day                 | 120 (75)           | 230 (73)                 | 39 (61)             |         |
| Several times/day              | 11 (7)             | 23 (7)                   | 5 (8)               |         |
| LTPA: sedentary                | 12 (7)             | 28 (9)                   | 6 (9)               | 0.9     |
| Moderate                       | 61 (38)            | 109 (35)                 | 27 (42)             |         |
| Regular training               | 75 (46)            | 149 (47)                 | 26 (41)             |         |
| Competitive sports             | 14 (9)             | 29 (9)                   | 5 (8)               |         |
| Current tobacco use            | 24 (15)            | 59 (19)                  | 15 (23)             | 0.3     |

<sup>a</sup> Kruskal-Wallis and chi-square tests for scale and categorical variables, respectively

<sup>b</sup> on a scale from 0 – 100

<sup>c</sup> seven categories, higher is better

<sup>d</sup> nine categories, higher values indicate a higher propensity to give socially desirable answers

**Table S3:** Cross-sectional associations between TFEQ scores and anthropometric measures <sup>a</sup>

|                                | Log BMI                   | Log WC                    | Log WHR               | Log WHtR                  | Log skinfolds <sup>d</sup> |
|--------------------------------|---------------------------|---------------------------|-----------------------|---------------------------|----------------------------|
| N                              | 530                       | 531                       | 530                   | 531                       | 522                        |
| R <sub>adj</sub> <sup>2</sup>  | 0.28                      | 0.23                      | 0.08                  | 0.24                      | 0.21                       |
| EE (SD)                        | 2.7**<br>(0.9, 4.5)       | 2.2**<br>(0.8, 3.6)       | 1.0*<br>(0.0, 1.9)    | 1.8*<br>(0.4, 3.2)        | 3.1<br>(-0.7, 6.9)         |
| UE (SD)                        | -0.7<br>(-2.3, 1.0)       | -0.6<br>(-1.9, 0.7)       | -0.6<br>(-1.5, 0.3)   | -0.9<br>(-2.2, 0.5)       | -0.3<br>(-3.7, 3.3)        |
| CR (SD)                        | 1.8*<br>(0.3, 3.4)        | 1.2*<br>(0.1, 2.4)        | 0.8*<br>(0.0, 1.6)    | 1.7**<br>(0.5, 2.9)       | 4.1*<br>(0.9, 7.5)         |
| Age stratum 50<br>(ref=38)     | 3.4*<br>(0.6, 6.2)        | 3.3**<br>(1.2, 5.5)       | 1.8*<br>(0.3, 3.3)    | 3.6**<br>(1.4, 65.9)      | 7.3*<br>(1.3, 13.6)        |
| University education           | -2.8<br>(-5.5, 0.0)       | -1.8<br>(-3.9, 0.4)       | -0.6<br>(-2.1, 1.0)   | -2.2<br>(-4.3, 0.1)       | -6.1*<br>(-11.6, -0.4)     |
| Living with a partner          | -4.8**<br>(-7.7, -1.7)    | -2.7*<br>(-5.0, -0.3)     | -0.8<br>(-2.5, 0.8)   | -2.7*<br>(-5.1, -0.2)     | -7.2*<br>(-13.1, -0.9)     |
| Wellbeing <sup>b</sup>         | -0.2<br>(-1.2, 0.9)       | -0.3<br>(-1.1, 0.5)       | -0.4<br>(-0.9, 0.2)   | -0.6<br>(-1.4, 0.2)       | -1.3<br>(-3.4, 0.9)        |
| Dieting (ref=never)            |                           |                           |                       |                           |                            |
| Former only                    | 8.9***<br>(5.7, 12.2)     | 5.3***<br>(2.8, 7.8)      | 1.5<br>(-0.2, 3.1)    | 5.6***<br>(3.1, 8.2)      | 9.3**<br>(2.5, 16.4)       |
| Current                        | 17.4***<br>(11.7, 23.4)   | 8.9***<br>(4.7, 13.2)     | 0.3<br>(-2.3, 3.0)    | 9.2***<br>(5.0, 13.6)     | 22.1***<br>(9.9, 35.6)     |
| Sweets (ref=never)             |                           |                           |                       |                           |                            |
| Few sweets/day                 | 2.8<br>(-0.5, 6.2)        | 2.0<br>(-0.5, 4.6)        | -0.1<br>(-1.8, 1.7)   | 1.5<br>(-1.0, 4.2)        | 4.9<br>(-2.1, 12.4)        |
| Several times/day              | 7.2*<br>(1.1, 13.7)       | 3.9<br>(-0.7, 8.8)        | 0.5<br>(-2.6, 3.7)    | 4.6<br>(-0.2, 9.6)        | 10.3<br>(-2.5, 24.8)       |
| Coffee (cups/day)              | -0.5<br>(-1.2, 0.2)       | -0.2<br>(-0.7, 0.3)       | 0.0<br>(-0.3, 0.4)    | -0.4<br>(-0.9, 0.1)       | -2.4***<br>(-3.7, -1.0)    |
| Current tobacco use            | -0.4<br>(-3.8, 3.1)       | 0.1<br>(-2.7, 2.6)        | 1.0<br>(-0.8, 2.9)    | 0.3<br>(-2.4, 3.1)        | -6.7<br>(-13.3, 0.3)       |
| Ethanol intake (g/day)         | -0.1<br>(-0.4, 0.1)       | -0.1<br>(-0.3, 0.1)       | -0.0<br>(-0.2, 0.1)   | -0.2<br>(-0.4, 0.1)       | -0.5<br>(-1.1, 0.1)        |
| LTPA: (ref=sedentary)          |                           |                           |                       |                           |                            |
| Moderate                       | -3.0<br>(-7.6, 1.8)       | -1.2<br>(-4.9, 2.6)       | -0.3<br>(-2.8, 2.3)   | -2.2<br>(-5.9, 1.6)       | 2.2<br>(-7.8, 13.2)        |
| Regular training               | -7.2**<br>(-11.7, -2.6)   | -5.6**<br>(-9.1, -1.9)    | -3.1*<br>(-5.6, -0.5) | -6.6***<br>(-10.2, -2.9)  | -10.9*<br>(-19.7, -1.1)    |
| Competitive sports             | -14.8***<br>(-20.1, -9.3) | -11.2***<br>(-15.4, -6.7) | -4.0*<br>(-7.2, -0.7) | -11.8***<br>(-16.1, -7.3) | -25.3***<br>(-34.7, -14.4) |
| Eysenck lie scale <sup>c</sup> | 0.3<br>(-0.5, 1.0)        | 0.0<br>(-0.5, 0.6)        | 0.0<br>(-0.4, 0.4)    | 0.3<br>(-0.3, 0.9)        | 0.5<br>(-1.1, 2.1)         |

\* p &lt;.05, \*\* p &lt;.01, \*\*\* p&lt;.001

<sup>a</sup> linear regression of logarithmized values for anthropometry on the three TFEQ scores and potential confounders. Results are given in terms of the relative change in % per SD of TFEQ-score, i.e.  $(\exp(\beta) - 1) \times 100\%$ .<sup>b</sup> seven categories, higher is better<sup>c</sup> nine categories, higher values indicate a higher propensity to give socially desirable answers<sup>d</sup> sum of skinfolds (biceps, triceps, and subscapular skinfold)

**Table S4:** Association between TFEQ and BMI stratified by age group, by dieting behavior, and by smoking status <sup>a</sup>

|         | Age                   |                    | Dieting behavior    |                     | Current smoking     |                     |
|---------|-----------------------|--------------------|---------------------|---------------------|---------------------|---------------------|
|         | 38 years              | 50 years           | never               | former or current   | no                  | yes                 |
| EE (SD) | 4.4***<br>(2.0, 7.0)  | 0.9<br>(-1.5, 3.4) | 5.9**<br>(2.0, 9.9) | 2.5**<br>(0.5, 4.5) | 2.7**<br>(0.7, 4.6) | 3.1<br>(-1.1, 7.5)  |
| UE (SD) | -2.6*<br>(-4.9, -0.3) | 1.2<br>(-1.1, 3.6) | -2.3<br>(-5.6, 1.2) | -0.6<br>(-2.5, 1.3) | -0.4<br>(-2.2, 1.4) | -1.8<br>(-5.8, 2.4) |
| CR (SD) | 1.9<br>(-0.2, 4.1)    | 1.6<br>(-0.3, 3.5) | 3.7**<br>(1.0, 6.5) | 2.1*<br>(0.4, 3.9)  | 2.3**<br>(0.7, 3.9) | -0.4<br>(-3.5, 2.8) |

\* p <.05, \*\* p <.01, \*\*\* p<.001

<sup>a</sup> percentage change with 95% CI from linear regression of log BMI on TFEQ scores adjusted for age, education, living with a partner, dieting, consumption of sweets, consumption of coffee, ethanol intake, current tobacco use, and the Eysenck lie scale.

**Table S5:** Associations of EE and CR with dichotomized adiposity markers (results shown in Figure 1)<sup>ab</sup>.

|                            | Overweight<br>(n = 199/534) | Obesity<br>(n = 73/538) | WC > 88 cm<br>(n = 133/536) | WHR ≥ 0.85<br>(n = 143/538) | WHtR ≥ 0.5<br>(n = 220/539) | Skinfolds > 64 mm <sup>c</sup><br>(n = 106/526) |
|----------------------------|-----------------------------|-------------------------|-----------------------------|-----------------------------|-----------------------------|-------------------------------------------------|
| EE (SD)                    | 1.37**<br>(1.11, 1.68)      | 1.62***<br>(1.26, 2.10) | 1.57***<br>(1.26, 1.95)     | 1.30*<br>(1.06, 1.59)       | 1.25*<br>(1.02, 1.53)       | 1.21<br>(0.97, 1.51)                            |
| CR (SD)                    | 1.16<br>(0.92, 1.46)        | 0.98<br>(0.71, 1.34)    | 1.18<br>(0.91, 1.52)        | 1.29*<br>(1.02, 1.63)       | 1.19<br>(0.95, 1.49)        | 1.17<br>(0.90, 1.52)                            |
| Age stratum 50<br>(ref=38) | 1.73*<br>(1.14, 2.64)       | -                       | -                           | 1.62*<br>(1.07, 2.45)       | -                           | -                                               |
| University<br>education    | 0.54**<br>(0.36, 0.83)      | -                       | 0.52**<br>(0.33, 0.81)      | -                           | -                           | 0.59*<br>(0.38, 0.94)                           |
| Living with a<br>partner   | -                           | 0.49*<br>(0.27, 0.89)   | 0.46**<br>(0.28, 0.76)      | -                           | 0.54*<br>(0.34, 0.86)       | -                                               |
| LTPA (ref = sedentary)     |                             |                         |                             |                             |                             |                                                 |
| Moderate                   | 0.91<br>(0.44, 1.89)        | 0.75<br>(0.33, 1.71)    | 0.64<br>(0.31, 1.31)        | 0.80<br>(0.40, 1.63)        | 0.44*<br>(0.21, 0.91)       | 0.85<br>(0.41, 1.76)                            |
| Regular<br>training        | 0.39*<br>(0.19, 0.81)       | 0.30**<br>(0.13, 0.72)  | 0.31**<br>(0.15, 0.66)      | 0.52<br>(0.26, 1.07)        | 0.22***<br>(0.10, 0.45)     | 0.38*<br>(0.18, 0.81)                           |
| Competitive<br>sports      | 0.07***<br>(0.02, 0.25)     | 0.07*<br>(0.01, 0.55)   | 0.03***<br>(0.003, 0.02)    | 0.21**<br>(0.07, 0.66)      | 0.04***<br>(0.01, 0.13)     | 0.22*<br>(0.06, 0.75)                           |
| Dieting (ref=never)        |                             |                         |                             |                             |                             |                                                 |
| Former only                | 2.60***<br>(1.55, 4.36)     | 4.81**<br>(1.81, 12.8)  | 2.11*<br>(1.16, 3.85)       | 2.00*<br>(1.17, 3.41)       | 2.29***<br>(1.42, 3.69)     | 1.58<br>(0.87, 2.86)                            |
| Current                    | 10.4***<br>(4.55, 23.9)     | 8.75***<br>(2.66, 28.8) | 3.84**<br>(1.66, 8.90)      | 1.62<br>(0.74, 3.55)        | 6.95***<br>(3.21, 15.1)     | 2.59*<br>(1.12, 5.97)                           |
| Current tobacco<br>use     | -                           | -                       | -                           | 1.67*<br>(1.01, 2.75)       | -                           | -                                               |
| AUROC                      | 0.78                        | 0.79                    | 0.78                        | 0.69                        | 0.76                        | 0.70                                            |

\* p <.05, \*\* p <.01, \*\*\* p<.001

<sup>a</sup> logistic regression with stepwise forward variable selection from covariates listed in Table 2, forcing the TFEQ variables EE and CR into the regression model (odds ratio with 95% CI)

<sup>b</sup> Uncontrolled eating was not associated with any outcome and was not included in the logistic regression models in order to restrict the number of predictors in relation to the number of events.

<sup>c</sup> highest quintile vs. lower values of the sum of skinfolds (biceps, triceps, and subscapular skinfold)
